# Supplementary material
Source: Royal Society of Chemistry journal article supplement (doi:10.1039/d5ea00134j)
Supplement: d5ea00134j1.pdf [file d5ea00134j1.pdf]

Supplementary Information:

## Regulation and Reformulation: How the EU Paints Directive Shaped Volatile Organic Compound Emissions from UK Decorative Paints

Lidia Kristia Alfanti <sup>\*a</sup>, Amber May Yeoman <sup>a,b</sup>, Andrew Robert Rickard <sup>a,b</sup>, David Shaw <sup>b,c</sup>,  
Martyn William Ward <sup>a,b</sup>, Sarah Julia Moller <sup>a,b</sup>, and Alastair Charles Lewis <sup>a,b</sup>

<sup>a</sup> *Wolfson Atmospheric Chemistry Laboratories, University of York, York, YO10 5DD, UK*

<sup>b</sup> *National Centre for Atmospheric Science, University of York, York, YO10 5DD, UK*

<sup>c</sup> *Department of Environment and Geography, University of York, York, YO10 5DD, UK*

---

### S1. Estimation of photochemical ozone creation potential (POCP<sub>E</sub>)

The equation for POCP<sub>E</sub> in Eq. (1) includes  $\gamma_S$ , R, and S, which are the core parameters used for all VOCs.  $\gamma_S$  is obtained with the following equation:

$$\gamma_S = (n_B/6) \times (28.05/M) \quad (\text{i})$$

$n_B$  is the number of oxidizable bonds of the VOC, and M is the molecular mass. 6 and 28.05 are the number of oxidizable bonds and molecular mass of ethene as the reference VOC, as POCP values are relative to ethene = 100. R is a reactivity element that is also related to the OH reactivity of the VOC, as follows:

$$R = 1 - (B \cdot \gamma_R + 1)^{-1} \quad (\text{ii})$$

$$\gamma_R = (k_{OH}/k_{OH}^0) \times (6/n_B) \quad (\text{iii})$$

$k_{OH}$  is the rate coefficient for the reaction of the VOC with OH under standard conditions (298 K, 1 atm) and  $k_{OH}^0$  for the reference VOC, ethene. B is a numerical constant, which multi-day north-west European conditions is used in this study. The parameter S is related to the size of the VOC, and is given by:

$$S = (1 - \alpha) \times \exp(-C \cdot n_C^\beta) + \alpha \quad (\text{iv})$$

$n_C$  is the carbon number of the VOC. The values of  $\alpha$ ,  $C$ , and  $\beta$  may be adjusted and optimised to represent the dependence of POCP on VOC size across varying timescales. The value for the parameters used in this study is based on Jenkin et al. (2017)<sup>1</sup> as follows:

Table S1. Parameters for the calculation of POCP<sub>E</sub> values

| Parameter       | VOC class                           | North-west European conditions |
|-----------------|-------------------------------------|--------------------------------|
| A               | aliphatics                          | 100                            |
|                 | aromatics with 0 alkyl substituents | 66                             |
|                 | aromatics with 1 alkyl substituents | 130                            |
|                 | aromatics with 2 alkyl substituents | 173                            |
|                 | aromatics with 3 alkyl substituents | 206                            |
| B               | all                                 | 4                              |
| $\alpha$        | all                                 | 0.56                           |
| C               | all                                 | 0.0038                         |
| $\beta$         | all                                 | 2.7                            |
| F               | all                                 | 1                              |
|                 | t-Butanol                           | 0.7                            |
| P               | all                                 | 0                              |
| R <sub>O3</sub> | all                                 | 0                              |
|                 | Limonene                            | 54                             |
| Q               | all                                 | 0                              |

## S2. Comparative VOC profiling of wall paints

Figure S1 supports Section 3.2. of the main text. The figure illustrates how the paint samples were grouped by functional type to assess similarities in their chemical profiles. This grouping did not reveal consistent patterns in VOC composition; therefore, in Figure 3 the samples are instead categorised by manufacturer.

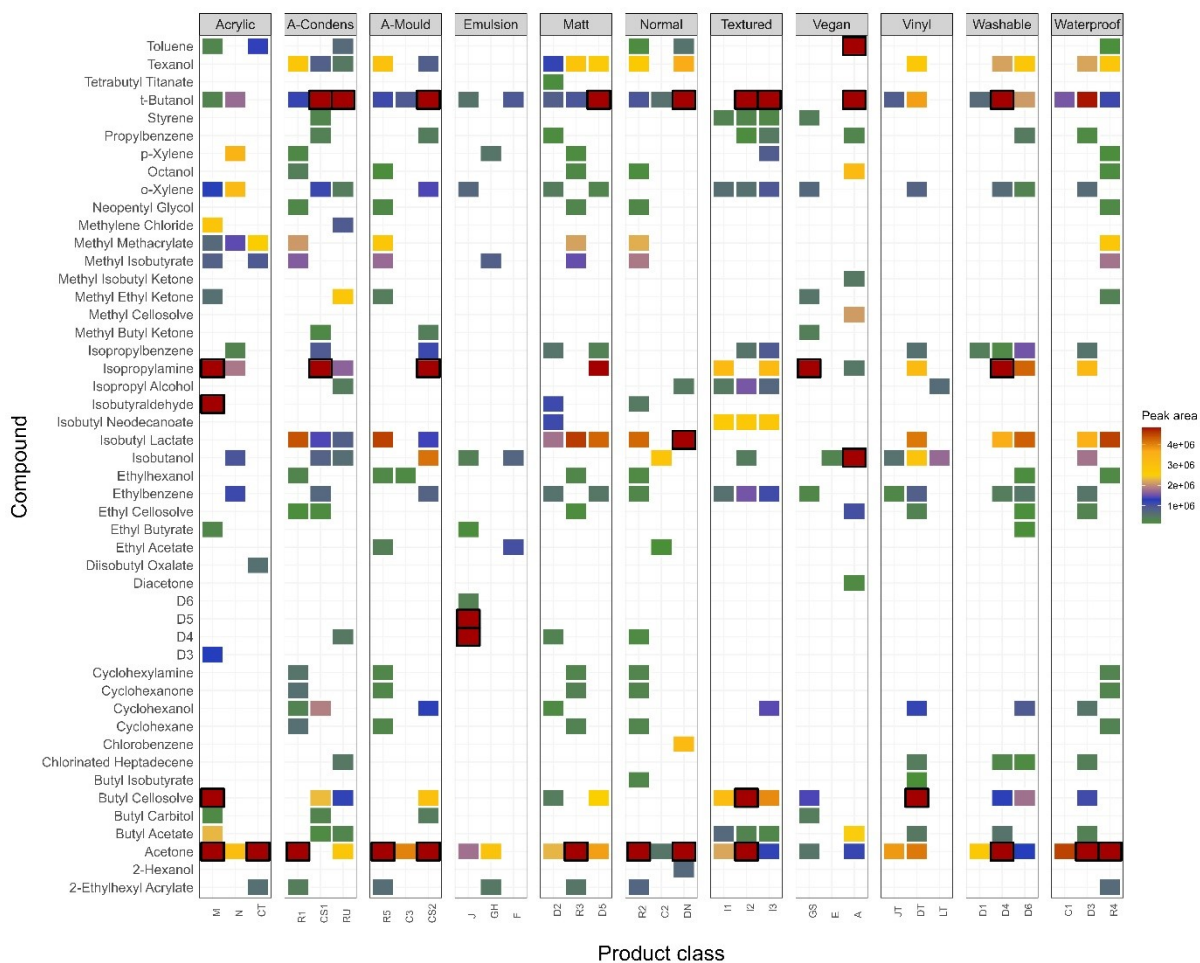

Figure S1. VOC speciation profiles of 33 decorative wall paints based on 2024 formulation data, grouped by functional type and VOC classification.

### S3. Atmospheric modelling settings

Table S2 supports section 3.5. of the main text. The table summarises the key input parameters used in the INCHEM-Py atmospheric model simulations. Simulations were run for decane (NC<sub>10</sub>H<sub>22</sub>) and t-butanol (TBUTOL) separately, each representing a dominant solvent in the 1990 and 2024 paint formulations respectively.

Table S2. INCHEM-Py input parameters

| Parameter                                                          | Value                                              |
|--------------------------------------------------------------------|----------------------------------------------------|
| MCM version                                                        | v3.3.1 <sup>2</sup>                                |
| Temperature                                                        | 293 K                                              |
| Relative humidity                                                  | 50%                                                |
| Light type                                                         | Off (no indoor or outdoor light)                   |
| Surface deposition                                                 | None                                               |
| Air change rate                                                    | 0 h <sup>-1</sup>                                  |
| OH (constant)                                                      | 1.00 × 10 <sup>6</sup> molecules cm <sup>-3</sup>  |
| O <sub>3</sub> (constant)                                          | 1.00 × 10 <sup>12</sup> molecules cm <sup>-3</sup> |
| NO <sub>3</sub> (constant)                                         | 1.00 × 10 <sup>8</sup> molecules cm <sup>-3</sup>  |
| Initial concentration – decane (NC <sub>10</sub> H <sub>22</sub> ) | 4.92 × 10 <sup>10</sup> molecules cm <sup>-3</sup> |
| Initial concentration – t-butanol (TBUTOL)                         | 9.45 × 10 <sup>10</sup> molecules cm <sup>-3</sup> |
| Simulation duration                                                | 7 days                                             |
| Output timestep                                                    | 3600 s (1 hour)                                    |

#### S4. INCHEM-Py simulation output data

The following data were extracted from the INCHEM-Py model output for decane and t-butanol simulations, providing hourly concentrations of key species over seven days.

Table S3. INCHEM-Py output data

| Time (h) | Concentration (molecules $\text{cm}^{-3} \times 10^{10}$ ) |       |           |       |
|----------|------------------------------------------------------------|-------|-----------|-------|
|          | decane                                                     | HCHO  | t-butanol | HCHO  |
| 0        | 4.920                                                      | 0.000 | 9.450     | 0.000 |
| 1        | 4.727                                                      | 0.000 | 9.414     | 0.035 |
| 2        | 4.542                                                      | 0.000 | 9.378     | 0.068 |
| 3        | 4.363                                                      | 0.002 | 9.343     | 0.101 |
| 4        | 4.192                                                      | 0.004 | 9.307     | 0.133 |
| 5        | 4.028                                                      | 0.007 | 9.272     | 0.163 |
| 6        | 3.870                                                      | 0.013 | 9.236     | 0.192 |
| 7        | 3.718                                                      | 0.020 | 9.201     | 0.221 |
| 8        | 3.572                                                      | 0.029 | 9.166     | 0.248 |
| 9        | 3.432                                                      | 0.040 | 9.131     | 0.275 |
| 10       | 3.298                                                      | 0.054 | 9.097     | 0.301 |
| 11       | 3.168                                                      | 0.070 | 9.062     | 0.325 |
| 12       | 3.044                                                      | 0.089 | 9.028     | 0.349 |
| 13       | 2.925                                                      | 0.111 | 8.993     | 0.372 |
| 14       | 2.810                                                      | 0.135 | 8.959     | 0.395 |
| 15       | 2.700                                                      | 0.162 | 8.925     | 0.416 |
| 16       | 2.594                                                      | 0.192 | 8.891     | 0.437 |
| 17       | 2.492                                                      | 0.226 | 8.857     | 0.457 |
| 18       | 2.394                                                      | 0.262 | 8.823     | 0.477 |
| 19       | 2.300                                                      | 0.301 | 8.790     | 0.495 |
| 20       | 2.210                                                      | 0.342 | 8.756     | 0.513 |
| 21       | 2.123                                                      | 0.387 | 8.723     | 0.531 |
| 22       | 2.040                                                      | 0.435 | 8.690     | 0.548 |
| 23       | 1.960                                                      | 0.485 | 8.657     | 0.564 |
| 24       | 1.883                                                      | 0.538 | 8.624     | 0.580 |
| 25       | 1.809                                                      | 0.594 | 8.591     | 0.595 |
| 26       | 1.738                                                      | 0.652 | 8.558     | 0.609 |
| 27       | 1.670                                                      | 0.713 | 8.526     | 0.623 |
| 28       | 1.605                                                      | 0.776 | 8.493     | 0.637 |

| Time (h) | Concentration (molecules $\text{cm}^{-3} \times 10^{10}$ ) |       |           |       |
|----------|------------------------------------------------------------|-------|-----------|-------|
|          | decane                                                     | HCHO  | t-butanol | HCHO  |
| 29       | 1.542                                                      | 0.841 | 8.461     | 0.650 |
| 30       | 1.481                                                      | 0.909 | 8.429     | 0.662 |
| 31       | 1.423                                                      | 0.978 | 8.397     | 0.674 |
| 32       | 1.367                                                      | 1.049 | 8.365     | 0.686 |
| 33       | 1.314                                                      | 1.122 | 8.333     | 0.697 |
| 34       | 1.262                                                      | 1.197 | 8.301     | 0.708 |
| 35       | 1.213                                                      | 1.273 | 8.270     | 0.718 |
| 36       | 1.165                                                      | 1.350 | 8.238     | 0.728 |
| 37       | 1.119                                                      | 1.429 | 8.207     | 0.738 |
| 38       | 1.076                                                      | 1.508 | 8.176     | 0.747 |
| 39       | 1.033                                                      | 1.589 | 8.145     | 0.756 |
| 40       | 0.993                                                      | 1.670 | 8.114     | 0.764 |
| 41       | 0.954                                                      | 1.752 | 8.083     | 0.772 |
| 42       | 0.916                                                      | 1.834 | 8.052     | 0.780 |
| 43       | 0.881                                                      | 1.917 | 8.022     | 0.788 |
| 44       | 0.846                                                      | 1.999 | 7.991     | 0.795 |
| 45       | 0.813                                                      | 2.082 | 7.961     | 0.802 |
| 46       | 0.781                                                      | 2.165 | 7.930     | 0.808 |
| 47       | 0.750                                                      | 2.247 | 7.900     | 0.815 |
| 48       | 0.721                                                      | 2.329 | 7.870     | 0.821 |
| 49       | 0.693                                                      | 2.411 | 7.840     | 0.827 |
| 50       | 0.665                                                      | 2.492 | 7.810     | 0.832 |
| 51       | 0.639                                                      | 2.572 | 7.781     | 0.837 |
| 52       | 0.614                                                      | 2.651 | 7.751     | 0.843 |
| 53       | 0.590                                                      | 2.730 | 7.722     | 0.847 |
| 54       | 0.567                                                      | 2.807 | 7.692     | 0.852 |
| 55       | 0.545                                                      | 2.884 | 7.663     | 0.856 |
| 56       | 0.523                                                      | 2.959 | 7.634     | 0.861 |

| Time (h) | Concentration (molecules $\text{cm}^{-3} \times 10^{10}$ ) |       |           |       |
|----------|------------------------------------------------------------|-------|-----------|-------|
|          | decane                                                     | HCHO  | t-butanol | HCHO  |
| 57       | 0.503                                                      | 3.033 | 7.605     | 0.865 |
| 58       | 0.483                                                      | 3.105 | 7.576     | 0.868 |
| 59       | 0.464                                                      | 3.176 | 7.547     | 0.872 |
| 60       | 0.446                                                      | 3.246 | 7.518     | 0.875 |
| 61       | 0.429                                                      | 3.314 | 7.490     | 0.879 |
| 62       | 0.412                                                      | 3.380 | 7.461     | 0.882 |
| 63       | 0.396                                                      | 3.444 | 7.433     | 0.885 |
| 64       | 0.380                                                      | 3.507 | 7.405     | 0.887 |
| 65       | 0.365                                                      | 3.568 | 7.376     | 0.890 |
| 66       | 0.351                                                      | 3.627 | 7.348     | 0.892 |
| 67       | 0.337                                                      | 3.684 | 7.320     | 0.895 |
| 68       | 0.324                                                      | 3.739 | 7.293     | 0.897 |
| 69       | 0.311                                                      | 3.792 | 7.265     | 0.899 |
| 70       | 0.299                                                      | 3.843 | 7.237     | 0.901 |
| 71       | 0.287                                                      | 3.892 | 7.210     | 0.902 |
| 72       | 0.276                                                      | 3.939 | 7.182     | 0.904 |
| 73       | 0.265                                                      | 3.984 | 7.155     | 0.905 |
| 74       | 0.255                                                      | 4.027 | 7.128     | 0.907 |
| 75       | 0.245                                                      | 4.067 | 7.101     | 0.908 |
| 76       | 0.235                                                      | 4.106 | 7.074     | 0.909 |
| 77       | 0.226                                                      | 4.142 | 7.047     | 0.910 |
| 78       | 0.217                                                      | 4.177 | 7.020     | 0.911 |
| 79       | 0.209                                                      | 4.209 | 6.993     | 0.912 |
| 80       | 0.200                                                      | 4.240 | 6.966     | 0.913 |
| 81       | 0.192                                                      | 4.268 | 6.940     | 0.914 |
| 82       | 0.185                                                      | 4.294 | 6.914     | 0.914 |
| 83       | 0.178                                                      | 4.318 | 6.887     | 0.915 |
| 84       | 0.171                                                      | 4.340 | 6.861     | 0.915 |

| Time (h) | Concentration (molecules $\text{cm}^{-3} \times 10^{10}$ ) |       |           |       |
|----------|------------------------------------------------------------|-------|-----------|-------|
|          | decane                                                     | HCHO  | t-butanol | HCHO  |
| 85       | 0.164                                                      | 4.360 | 6.835     | 0.915 |
| 86       | 0.158                                                      | 4.378 | 6.809     | 0.916 |
| 87       | 0.151                                                      | 4.395 | 6.783     | 0.916 |
| 88       | 0.145                                                      | 4.409 | 6.757     | 0.916 |
| 89       | 0.140                                                      | 4.421 | 6.732     | 0.916 |
| 90       | 0.134                                                      | 4.432 | 6.706     | 0.916 |
| 91       | 0.129                                                      | 4.440 | 6.680     | 0.916 |
| 92       | 0.124                                                      | 4.447 | 6.655     | 0.916 |
| 93       | 0.119                                                      | 4.452 | 6.630     | 0.916 |
| 94       | 0.114                                                      | 4.455 | 6.605     | 0.915 |
| 95       | 0.110                                                      | 4.457 | 6.579     | 0.915 |
| 96       | 0.106                                                      | 4.457 | 6.554     | 0.915 |
| 97       | 0.101                                                      | 4.455 | 6.529     | 0.914 |
| 98       | 0.098                                                      | 4.451 | 6.505     | 0.914 |
| 99       | 0.094                                                      | 4.446 | 6.480     | 0.913 |
| 100      | 0.090                                                      | 4.440 | 6.455     | 0.913 |
| 101      | 0.086                                                      | 4.432 | 6.431     | 0.912 |
| 102      | 0.083                                                      | 4.423 | 6.406     | 0.911 |
| 103      | 0.080                                                      | 4.412 | 6.382     | 0.911 |
| 104      | 0.077                                                      | 4.400 | 6.358     | 0.910 |
| 105      | 0.074                                                      | 4.386 | 6.333     | 0.909 |
| 106      | 0.071                                                      | 4.371 | 6.309     | 0.908 |
| 107      | 0.068                                                      | 4.355 | 6.285     | 0.907 |
| 108      | 0.065                                                      | 4.338 | 6.261     | 0.906 |
| 109      | 0.063                                                      | 4.320 | 6.238     | 0.905 |
| 110      | 0.060                                                      | 4.300 | 6.214     | 0.904 |
| 111      | 0.058                                                      | 4.280 | 6.190     | 0.903 |
| 112      | 0.056                                                      | 4.258 | 6.167     | 0.902 |

| Time (h) | Concentration (molecules $\text{cm}^{-3} \times 10^{10}$ ) |       |           |       |
|----------|------------------------------------------------------------|-------|-----------|-------|
|          | decane                                                     | HCHO  | t-butanol | HCHO  |
| 113      | 0.054                                                      | 4.235 | 6.143     | 0.901 |
| 114      | 0.051                                                      | 4.212 | 6.120     | 0.900 |
| 115      | 0.049                                                      | 4.187 | 6.097     | 0.899 |
| 116      | 0.047                                                      | 4.162 | 6.073     | 0.898 |
| 117      | 0.046                                                      | 4.135 | 6.050     | 0.897 |
| 118      | 0.044                                                      | 4.108 | 6.027     | 0.896 |
| 119      | 0.042                                                      | 4.080 | 6.004     | 0.894 |
| 120      | 0.040                                                      | 4.052 | 5.981     | 0.893 |
| 121      | 0.039                                                      | 4.022 | 5.959     | 0.892 |
| 122      | 0.037                                                      | 3.992 | 5.936     | 0.891 |
| 123      | 0.036                                                      | 3.961 | 5.913     | 0.889 |
| 124      | 0.034                                                      | 3.930 | 5.891     | 0.888 |
| 125      | 0.033                                                      | 3.898 | 5.869     | 0.887 |
| 126      | 0.032                                                      | 3.866 | 5.846     | 0.885 |
| 127      | 0.031                                                      | 3.833 | 5.824     | 0.884 |
| 128      | 0.029                                                      | 3.800 | 5.802     | 0.882 |
| 129      | 0.028                                                      | 3.766 | 5.780     | 0.881 |
| 130      | 0.027                                                      | 3.731 | 5.758     | 0.880 |
| 131      | 0.026                                                      | 3.697 | 5.736     | 0.878 |
| 132      | 0.025                                                      | 3.662 | 5.714     | 0.877 |
| 133      | 0.024                                                      | 3.626 | 5.692     | 0.875 |
| 134      | 0.023                                                      | 3.591 | 5.671     | 0.874 |
| 135      | 0.022                                                      | 3.555 | 5.649     | 0.872 |
| 136      | 0.021                                                      | 3.519 | 5.628     | 0.871 |
| 137      | 0.020                                                      | 3.482 | 5.606     | 0.869 |
| 138      | 0.020                                                      | 3.446 | 5.585     | 0.868 |
| 139      | 0.019                                                      | 3.409 | 5.564     | 0.866 |
| 140      | 0.018                                                      | 3.372 | 5.542     | 0.865 |

| Time (h) | Concentration (molecules $\text{cm}^{-3} \times 10^{10}$ ) |       |           |       |
|----------|------------------------------------------------------------|-------|-----------|-------|
|          | decane                                                     | HCHO  | t-butanol | HCHO  |
| 141      | 0.017                                                      | 3.335 | 5.521     | 0.863 |
| 142      | 0.017                                                      | 3.298 | 5.500     | 0.862 |
| 143      | 0.016                                                      | 3.261 | 5.479     | 0.860 |
| 144      | 0.015                                                      | 3.224 | 5.459     | 0.858 |
| 145      | 0.015                                                      | 3.186 | 5.438     | 0.857 |
| 146      | 0.014                                                      | 3.149 | 5.417     | 0.855 |
| 147      | 0.014                                                      | 3.111 | 5.397     | 0.854 |
| 148      | 0.013                                                      | 3.074 | 5.376     | 0.852 |
| 149      | 0.013                                                      | 3.037 | 5.356     | 0.850 |
| 150      | 0.012                                                      | 2.999 | 5.335     | 0.849 |
| 151      | 0.012                                                      | 2.962 | 5.315     | 0.847 |
| 152      | 0.011                                                      | 2.925 | 5.295     | 0.846 |
| 153      | 0.011                                                      | 2.888 | 5.275     | 0.844 |
| 154      | 0.010                                                      | 2.851 | 5.254     | 0.842 |
| 155      | 0.010                                                      | 2.814 | 5.234     | 0.841 |
| 156      | 0.010                                                      | 2.778 | 5.215     | 0.839 |
| 157      | 0.009                                                      | 2.741 | 5.195     | 0.838 |
| 158      | 0.009                                                      | 2.705 | 5.175     | 0.836 |
| 159      | 0.008                                                      | 2.668 | 5.155     | 0.834 |
| 160      | 0.008                                                      | 2.632 | 5.136     | 0.833 |
| 161      | 0.008                                                      | 2.596 | 5.116     | 0.831 |
| 162      | 0.008                                                      | 2.561 | 5.097     | 0.829 |
| 163      | 0.007                                                      | 2.525 | 5.077     | 0.828 |
| 164      | 0.007                                                      | 2.490 | 5.058     | 0.826 |
| 165      | 0.007                                                      | 2.455 | 5.039     | 0.824 |
| 166      | 0.006                                                      | 2.420 | 5.020     | 0.823 |
| 167      | 0.006                                                      | 2.386 | 5.000     | 0.821 |
| 168      | 0.006                                                      | 2.352 | 4.981     | 0.819 |

## References

1. M. E. Jenkin, R. G. Derwent and T. J. Wallington, Photochemical ozone creation potentials for volatile organic compounds: Rationalization and estimation, *Atmospheric Environment*, 2017, **163**, 128-137.
2. Master Chemical Mechanism v3.3.1, [www.mcm.york.ac.uk](http://www.mcm.york.ac.uk).
